# Supplementary material for: Late Quaternary glacial maxima in Southern Patagonia: insights from the Lago Argentino glacier lobe
Source: Copernicus journal article supplement (doi:10.5194/cp-2024-24), 2024-03-26
Supplement: Supplementary file 1 [file cp-2024-24-supplement.pdf]

**Climate of the Past**  
Supplementary materials

**Late Quaternary glacial maxima in Southern Patagonia: insights from the  
Lago Argentino glacier lobe**

Matias Romero<sup>1,2,3</sup>, Shanti B. Penprase<sup>4,5</sup>, Maximillian S. Van Wyk de Vries<sup>4,5,6,7,8,9,10</sup>, Andrew D. Wickert<sup>4,5</sup>, Andrew G. Jones<sup>3</sup>, Shaun A. Marcott<sup>3</sup>, Jorge A. Strelin<sup>2,11</sup>, Mateo A. Martini<sup>1,2</sup>, Tammy M. Rittenour<sup>12</sup>, Guido Brignone<sup>1</sup>, Mark D. Shapley<sup>13</sup>, Emi Ito<sup>4,13</sup>, Kelly R. MacGregor<sup>14</sup>, and Marc W. Caffee<sup>15,16</sup>

<sup>1</sup>Facultad de Ciencias Exactas, Físicas y Naturales (FCEFyN), Universidad Nacional de Córdoba, Av. Haya de la Torre, Córdoba, X5000HUA, Argentina; <sup>2</sup>Centro de Investigaciones en Ciencias de la Tierra (CICTERRA), Consejo Nacional de Investigaciones Científicas y Tecnológicas (CONICET), Córdoba, X5000IND, Argentina; <sup>3</sup>Department of Geoscience, University of Wisconsin-Madison, Madison, Wisconsin, USA; <sup>4</sup>Department of Earth Environmental Sciences, University of Minnesota, Minneapolis, MN 55455, USA; <sup>5</sup>Saint Anthony Falls Laboratory, University of Minnesota, Minneapolis, MN 55455, USA; <sup>6</sup>School of Environmental Sciences, University of Liverpool, Liverpool, L3 5DA, UK; <sup>7</sup>School of Geography and the Environment, University of Oxford, Oxford OX1 3QY, UK; <sup>8</sup>School of Geography, University of Nottingham, Nottingham, NG7 2RD, UK; <sup>9</sup>Department of Geography, University of Cambridge, Cambridge CB2 3EL, UK.; <sup>10</sup>Department of Earth Sciences, University of Cambridge, Cambridge CB3 0EZ, UK; <sup>11</sup>Sektion 4.6: Geomorphologie, Deutsches GeoForschungsZentrum (GFZ), Potsdam, 14473, Germany; <sup>12</sup>Instituto Antártico Argentino, Argentina; <sup>13</sup>Department of Geosciences, Utah State University, Logan, UT 84322; <sup>14</sup>Continental Scientific Drilling Facility, Department of Earth and Environmental Sciences, University of Minnesota, Minneapolis, MN, 55455, USA; <sup>15</sup>Department of Geology, Macalester College, Saint Paul, Minnesota 55105, USA; <sup>16</sup>Department of Physics and Astronomy, Purdue University, West Lafayette, IN 47907, USA; <sup>17</sup>Department of Earth, Atmospheric, and Planetary Science, Purdue University, West Lafayette, IN 47907, USA

Correspondence: Matias Romero ([mromero6@wisc.edu](mailto:mromero6@wisc.edu))

## **List of tables and figures**

Table S1: Cosmogenic nuclide surface exposure ages calculated with different erosion rates.

Table S2:  $^{10}\text{Be}$  blank data.

Figure S1: A) Aerial orthomosaic of the upper Rio Santa Cruz basin. B) Mapped extent.

Figure S2: A) Direction and length of mapped glacial lineations. B) Histogram of mapped landforms according to their different depositional environments.

Figure S3: Mapped vs not mapped comparison of the most representative landforms identified in this study.

Figure S4: Erosional and depositional features identified in the field and by satellite imagery.

Figure S5: Probability distribution functions of the three moraine complexes sampled and dated.

Figure S7: Probability distribution functions of the three moraine complexes dated along with the distributions obtained for different erosion rates.

Figure S8: IRSL age distributions.

References.

**Table S1:**  $^{10}\text{Be}$  ages for boulders sampled from the three moraine complexes in this study. We report the ages according to the different scaling schemes time dependent scaling (Lm: Lal, 1991; Stone, 2000), the non-time-dependent scaling (St: Stone, 2000; Lal, 1991), and the LSDn scaling scheme developed by Lifton et al. (2014) along with 1sigma internal uncertainty. We calculate these ages with three different erosion rates as a part of a sensitivity test with published erosion rates in Patagonia ranging from 0.2–1.4 mm/ka according to Douglass et al. (2006) and Kaplan et al. (2005), respectively. These ages were calculated using a local production rate developed for the late Glacial chronology at Lago Argentino ( $3.71 \pm 0.11$  atoms/g/yr: Kaplan et al., 2011).

| Sample                 | Age (ka) - St          | Age (ka) - Lm  | Age (ka) - LDSn       | Age (ka) - St            | Age (ka) - Lm  | Age (ka) - LDSn | Age (ka) - St            | Age (ka) - Lm  | Age (ka) - LDSn |
|------------------------|------------------------|----------------|-----------------------|--------------------------|----------------|-----------------|--------------------------|----------------|-----------------|
|                        | Erosion rate = 0 mm/yr |                |                       | Erosion rate = 0.2 mm/yr |                |                 | Erosion rate = 1.4 mm/yr |                |                 |
| <b>Arroyo Verde II</b> |                        |                |                       |                          |                |                 |                          |                |                 |
| AV-001                 | 258.04 ± 12.26         | 250.07 ± 11.86 | <b>243.05 ± 11.50</b> | 259.18 ± 12.37           | 251.15 ± 11.96 | 244.06 ± 11.60  | 266.34 ± 13.09           | 257.86 ± 12.63 | 250.40 ± 12.23  |
| AV-002                 | 139.40 ± 6.59          | 135.59 ± 6.41  | <b>132.10 ± 6.24</b>  | 139.73 ± 6.63            | 135.90 ± 6.44  | 132.40 ± 6.27   | 141.73 ± 6.82            | 137.79 ± 6.62  | 134185 ± 6440   |
| AV-003                 | 172.62 ± 8.31          | 167.79 ± 8.06  | <b>163.59 ± 7.85</b>  | 173.13 ± 8.35            | 168.27 ± 8.11  | 164.04 ± 7.90   | 176.23 ± 8.67            | 171.19 ± 8.40  | 166.83 ± 8.17   |
| AV-004                 | 172.13 ± 8.39          | 167.21 ± 8.14  | <b>163.15 ± 7.93</b>  | 172.63 ± 8.44            | 167.68 ± 8.19  | 163.61 ± 7.99   | 175.72 ± 8.75            | 170.59 ± 8.48  | 166.39 ± 8.26   |
| <b>El Tranquilo II</b> |                        |                |                       |                          |                |                 |                          |                |                 |
| ET-002                 | 61.44 ± 3.09           | 60.18 ± 3.03   | <b>59.14 ± 2.97</b>   | 61.50 ± 3.10             | 60.24 ± 3.03   | 59.20 ± 2.98    | 61.88 ± 3.14             | 60.60 ± 3.07   | 59.54 ± 3.02    |
| ET-004                 | 35.69 ± 2.44           | 34.99 ± 2.39   | <b>34.39 ± 2.35</b>   | 35.67 ± 2.44             | 35.01 ± 2.40   | 34.42 ± 2.35    | 35.83 ± 2.46             | 35.13 ± 2.41   | 34.53 ± 2.37    |
| ET-006                 | 32.02 ± 2.20           | 31.41 ± 2.16   | <b>30.86 ± 2.12</b>   | 32.04 ± 2.20             | 31.43 ± 2.16   | 30.88 ± 2.12    | 32.14 ± 2.22             | 31.523 ± 2.17  | 30.98 ± 2.14    |
| ET-012                 | 44.64 ± 2.16           | 43.68 ± 2.15   | <b>42.79 ± 2.07</b>   | 44.67 ± 2.16             | 43.72 ± 2.12   | 42.82 ± 2.08    | 44.87 ± 2.19             | 43.91 ± 2.14   | 43.00 ± 2.09    |
| ET-013                 | 38.49 ± 6.04           | 37.72 ± 5.92   | <b>37.10 ± 5.82</b>   | 38.51 ± 6.05             | 37.75 ± 5.93   | 37.13 ± 5.83    | 38.66 ± 6.10             | 37.88 ± 5.97   | 37.26 ± 5.87    |
| ET-014                 | 47.83 ± 2.88           | 46.78 ± 2.82   | <b>45.84 ± 2.77</b>   | 47.87 ± 2.89             | 46.82 ± 2.83   | 45.88 ± 2.77    | 48.10 ± 2.92             | 47047 ± 2854   | 46.09 ± 2.80    |
| ET-017                 | 39.04 ± 2.46           | 38.27 ± 2.42   | <b>37.60 ± 2.37</b>   | 39.06 ± 2.47             | 38.29 ± 2.42   | 37.62 ± 2.38    | 39.21 ± 2.49             | 38.43 ± 2.44   | 37.75 ± 2.39    |
| ET-018                 | 28.69 ± 1.59           | 28.20 ± 1.57   | <b>27.73 ± 1.54</b>   | 28.70 ± 1.60             | 28.21 ± 1.57   | 27.75 ± 1.54    | 28.79 ± 1.61             | 28.29 ± 1.58   | 27.82 ± 1.55    |
| <b>El Tranquilo I</b>  |                        |                |                       |                          |                |                 |                          |                |                 |
| ET-007                 | 39.18 ± 1.96           | 38.39 ± 1.92   | <b>37.76 ± 1.89</b>   | 39.20 ± 1.97             | 38.42 ± 1.93   | 37.79 ± 1.89    | 39.35 ± 1.98             | 38.56 ± 1.94   | 37.93 ± 1.91    |
| ET-008                 | 38.60 ± 1.96           | 37.84 ± 1.91   | <b>37.22 ± 1.89</b>   | 38.63 ± 1.96             | 37.86 ± 1.92   | 37.24 ± 1.89    | 38.78 ± 1.98             | 38.01 ± 1.94   | 37.38 ± 1.90    |
| ET-009                 | 37.04 ± 1.85           | 36.32 ± 1.82   | <b>35.74 ± 1.78</b>   | 37.07 ± 1.86             | 36.34 ± 1.82   | 35.76 ± 1.79    | 37.20 ± 1.87             | 36.47 ± 1.83   | 35.89 ± 1.80    |
| ET-010                 | 39.20 ± 1.90           | 38.41 ± 1.86   | <b>37.78 ± 1.83</b>   | 39.22 ± 1.90             | 38.43 ± 1.87   | 37.81 ± 1.83    | 39.38 ± 1.92             | 38.58 ± 1.88   | 37.95 ± 1.85    |
| ET-011                 | 36.49 ± 2.26           | 35.78 ± 2.21   | <b>35.21 ± 2.18</b>   | 36.51 ± 2.26             | 35.80 ± 2.22   | 35.23 ± 2.18    | 36.64 ± 2.28             | 35.93 ± 2.23   | 35.35 ± 2.20    |
| LA-01                  | 37.13 ± 2.66           | 36.38 ± 2.61   | <b>35.76 ± 2.56</b>   | 37.15 ± 2.67             | 36.40 ± 2.6    | 35.78 ± 2.57    | 37.29 ± 2.69             | 36.53 ± 2.63   | 35.90 ± 2.59    |

| Table S2. <sup>10</sup> Be Blank Data. All uncertainties are 1σ.                                                                                                  |                           |                                                |             |                                          |                                     |
|-------------------------------------------------------------------------------------------------------------------------------------------------------------------|---------------------------|------------------------------------------------|-------------|------------------------------------------|-------------------------------------|
| Blank ID                                                                                                                                                          | <sup>9</sup> Be Added (g) | <sup>10</sup> Be/ <sup>9</sup> Be <sup>a</sup> | Uncertainty | <sup>10</sup> Be (10 <sup>4</sup> atoms) | Uncertainty (10 <sup>4</sup> atoms) |
| Blank_34-1                                                                                                                                                        | 0.7697                    | 1.06E-15                                       | 3.55E-16    | 1.377247                                 | 0.459392                            |
| Blank_34-2                                                                                                                                                        | 0.7699                    | 1.24E-15                                       | 3.59E-16    | 1.608174                                 | 0.464404                            |
| Blank_34-3                                                                                                                                                        | 0.7689                    | 6.17E-16                                       | 3.43E-16    | 0.798183                                 | 0.44401                             |
| Blank_34-4                                                                                                                                                        | 0.7673                    | 7.73E-16                                       | 5.28E-16    | 0.997466                                 | 0.680543                            |
| Blank_34-5                                                                                                                                                        | 0.7651                    | 6.94E-16                                       | 5.45E-16    | 0.892893                                 | 0.70129                             |
| Blank_34-6                                                                                                                                                        | 0.7657                    | 9.46E-16                                       | 5.33E-16    | 1.217989                                 | 0.685859                            |
| Blank_45-2                                                                                                                                                        | 0.7652                    | 2.33E-15                                       | 8.23E-16    | 2.992946                                 | 1.058384                            |
| Blank_45-9                                                                                                                                                        | 0.7646                    | 6.78E-16                                       | 9.77E-16    | 0.871739                                 | 1.256187                            |
| <sup>a</sup> Measured relative to standard 07KNSTD with an assumed <sup>10</sup> Be/ <sup>9</sup> Be ratio of 2.85 x 10 <sup>-12</sup> (Nishiizumi et al., 2007). |                           |                                                |             |                                          |                                     |
| <sup>b</sup> Carrier used OSUWhite (251.6 ppm <sup>9</sup> Be)                                                                                                    |                           |                                                |             |                                          |                                     |

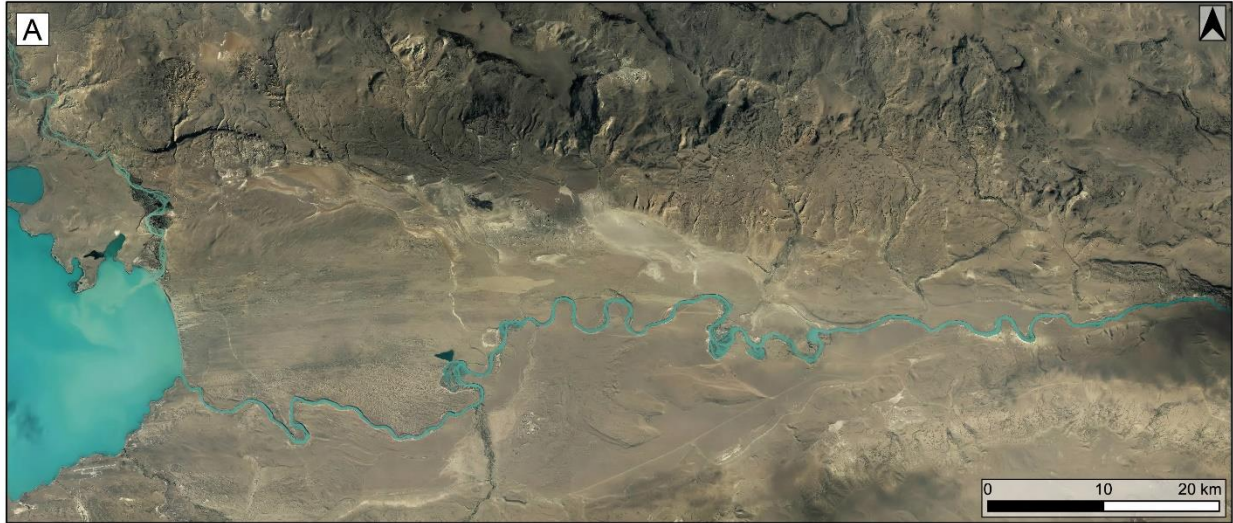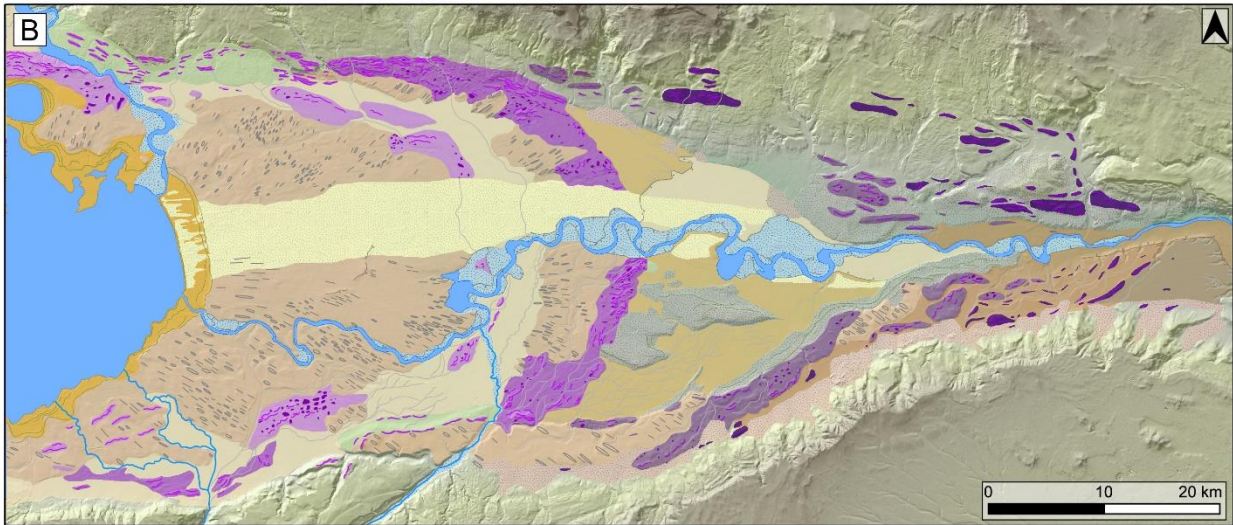

Fig. S 1

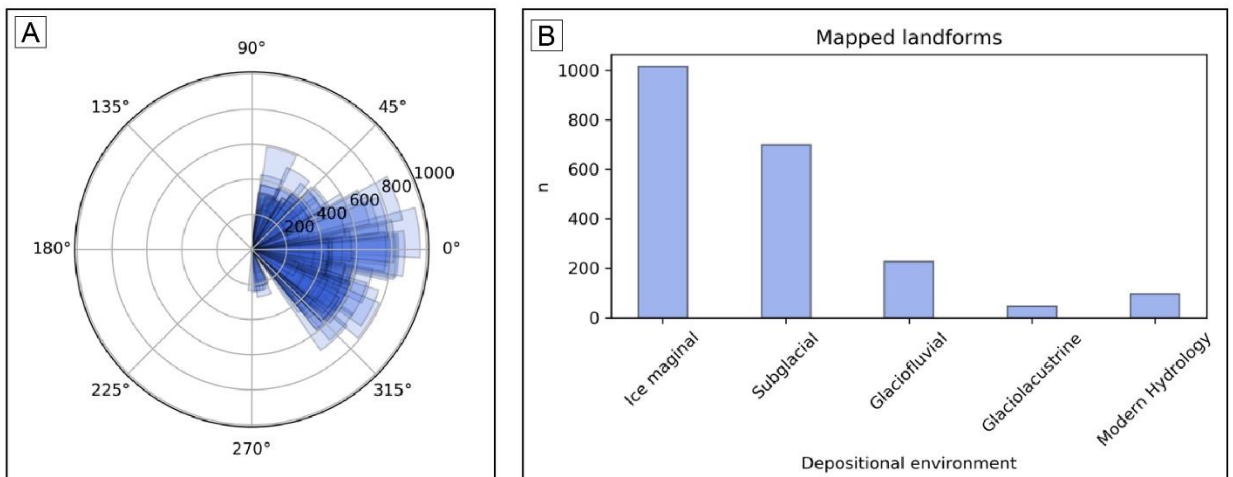

Fig. S 2

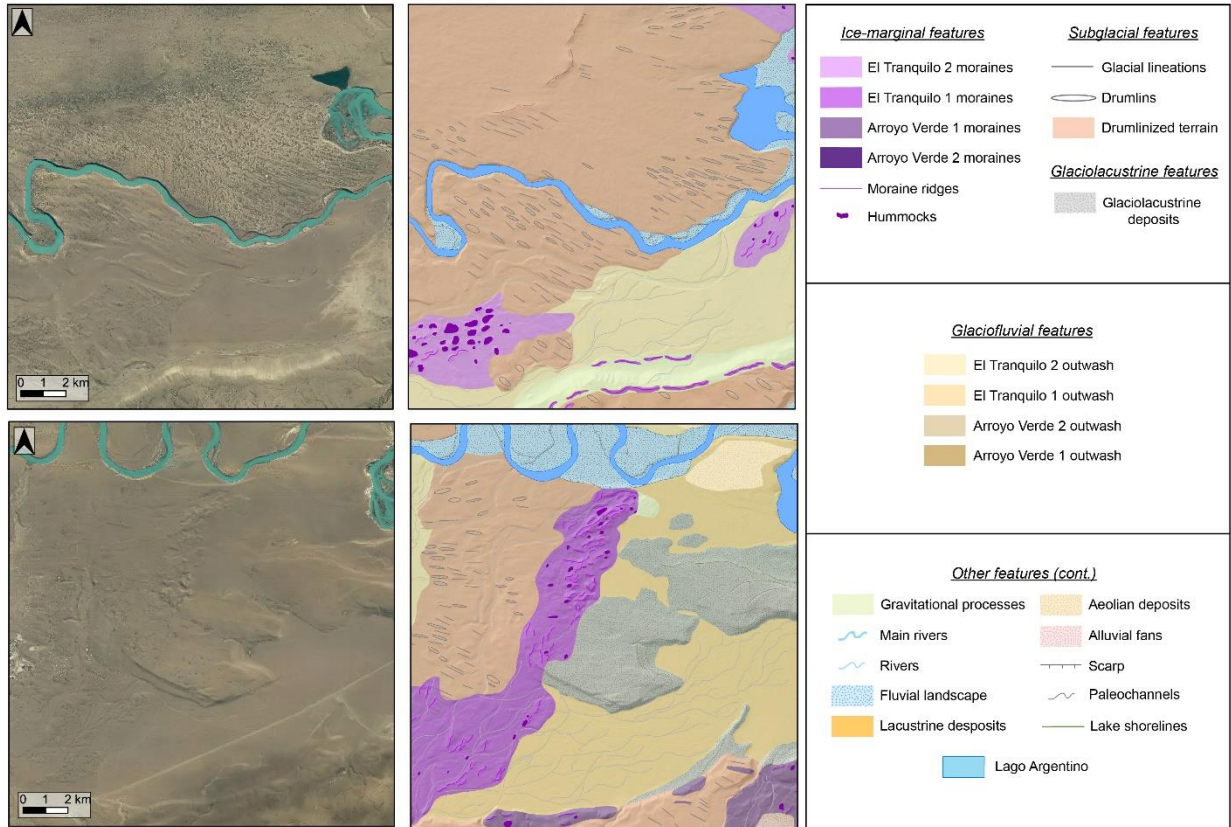

Fig. S 3

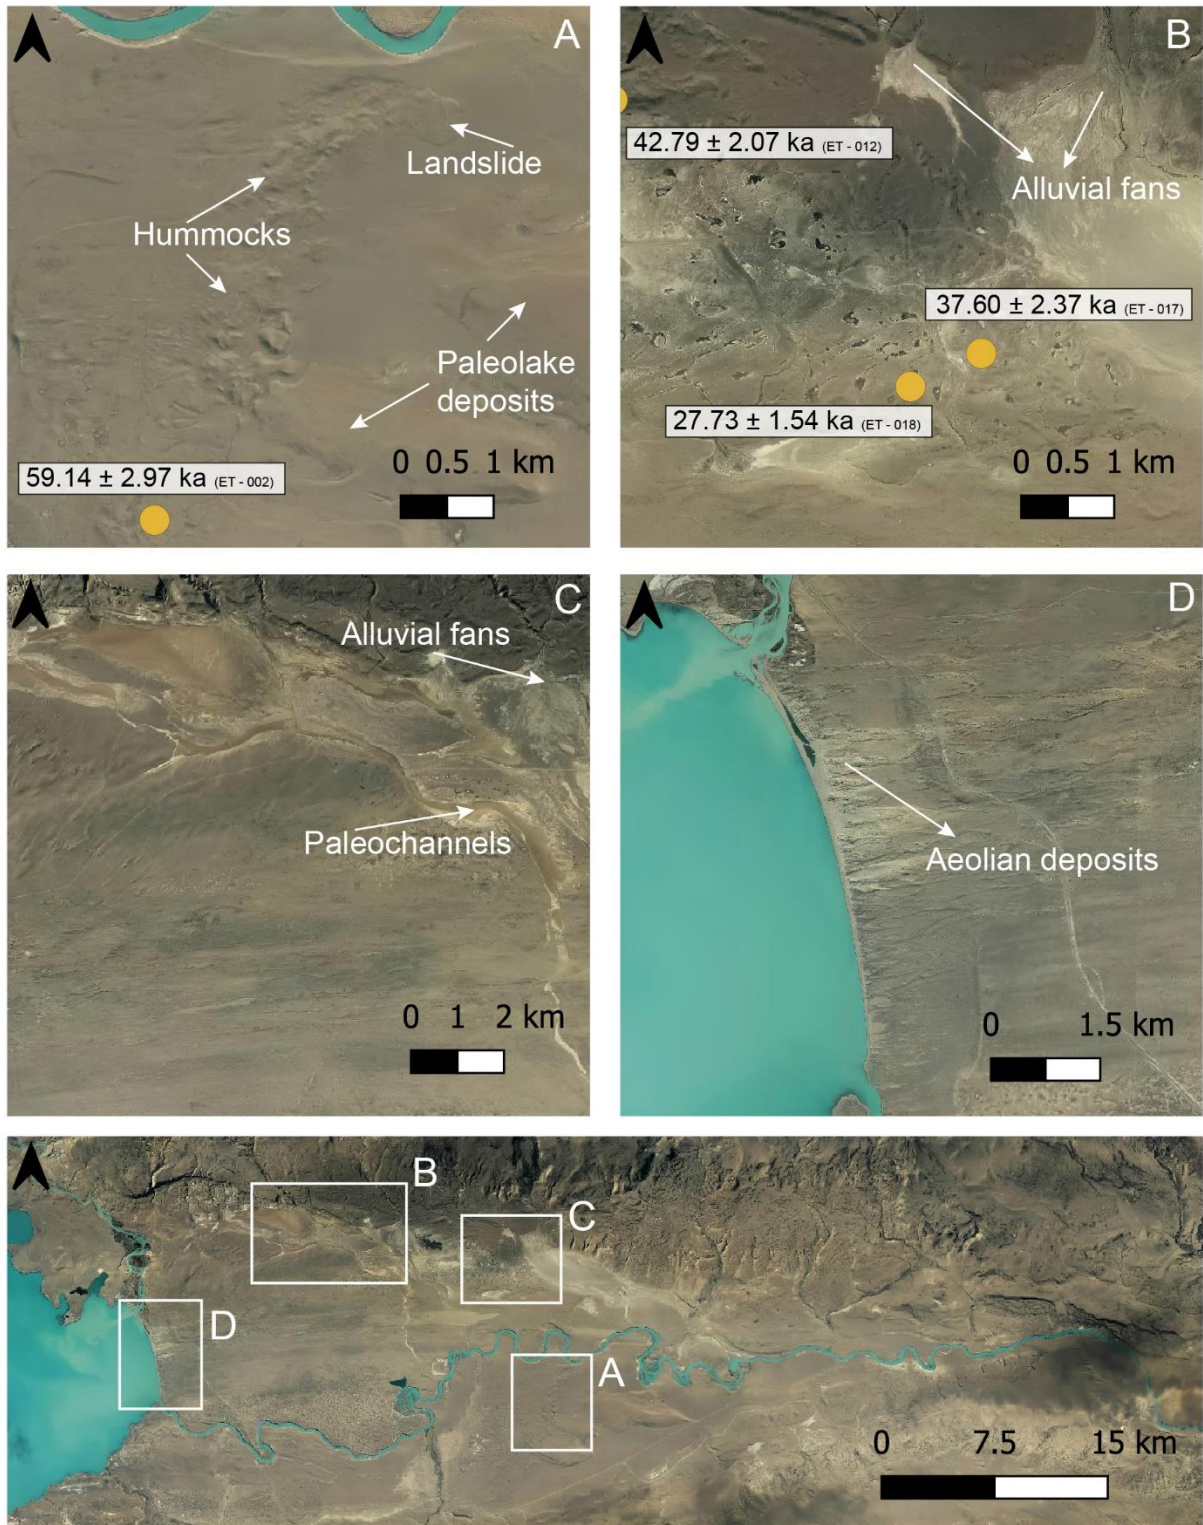

Fig. S 4

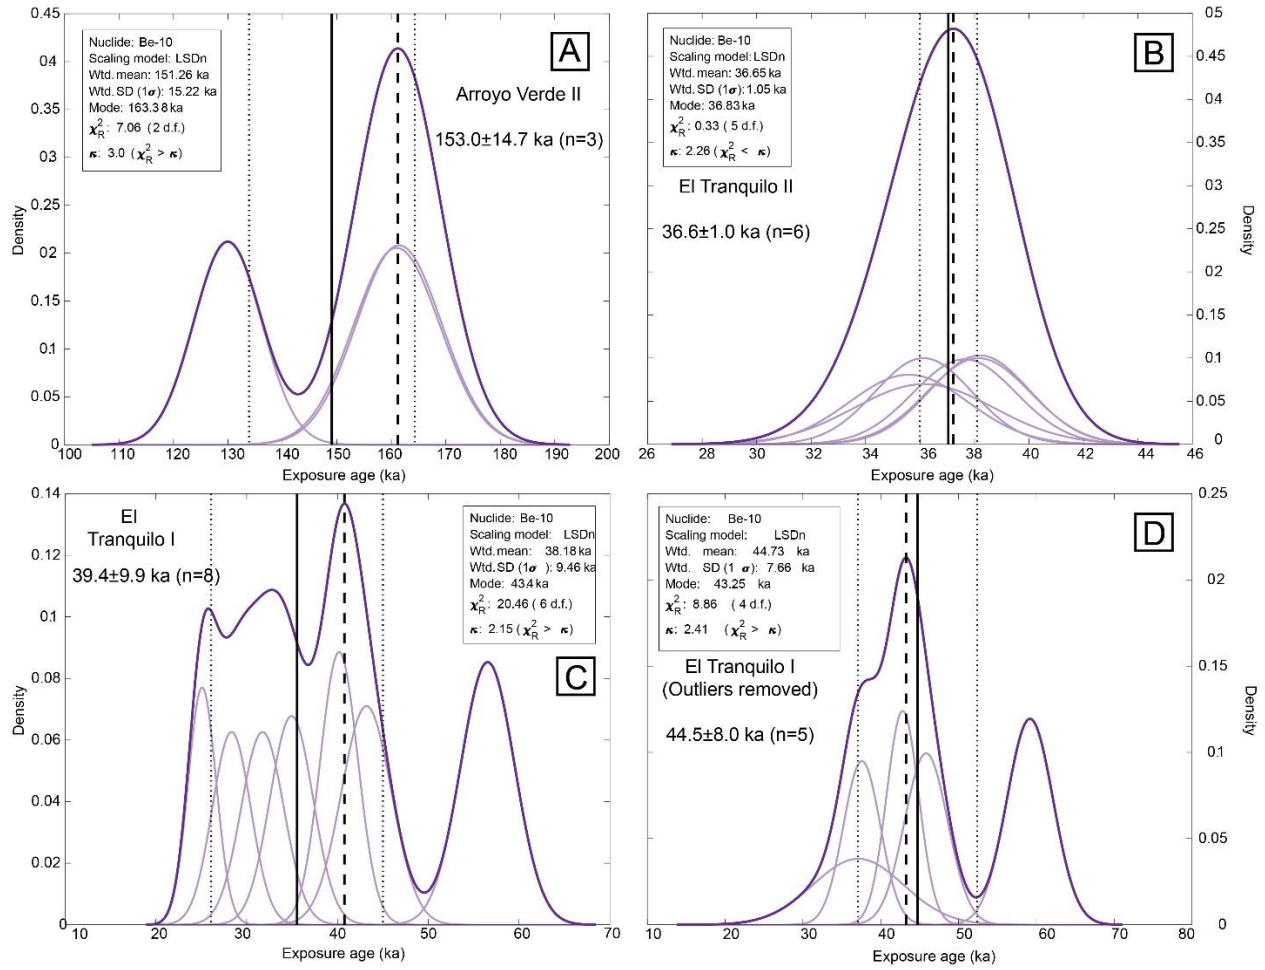

Fig. S 5



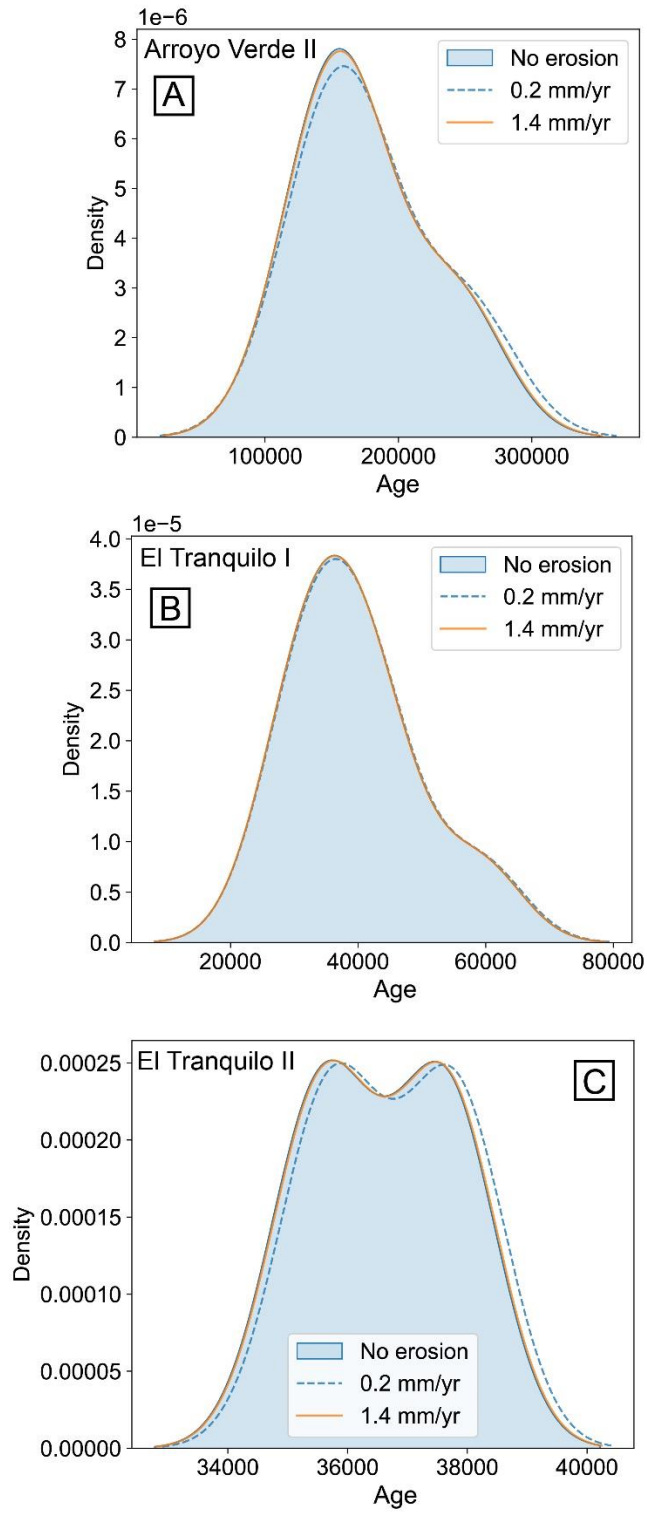

Fig. S 6

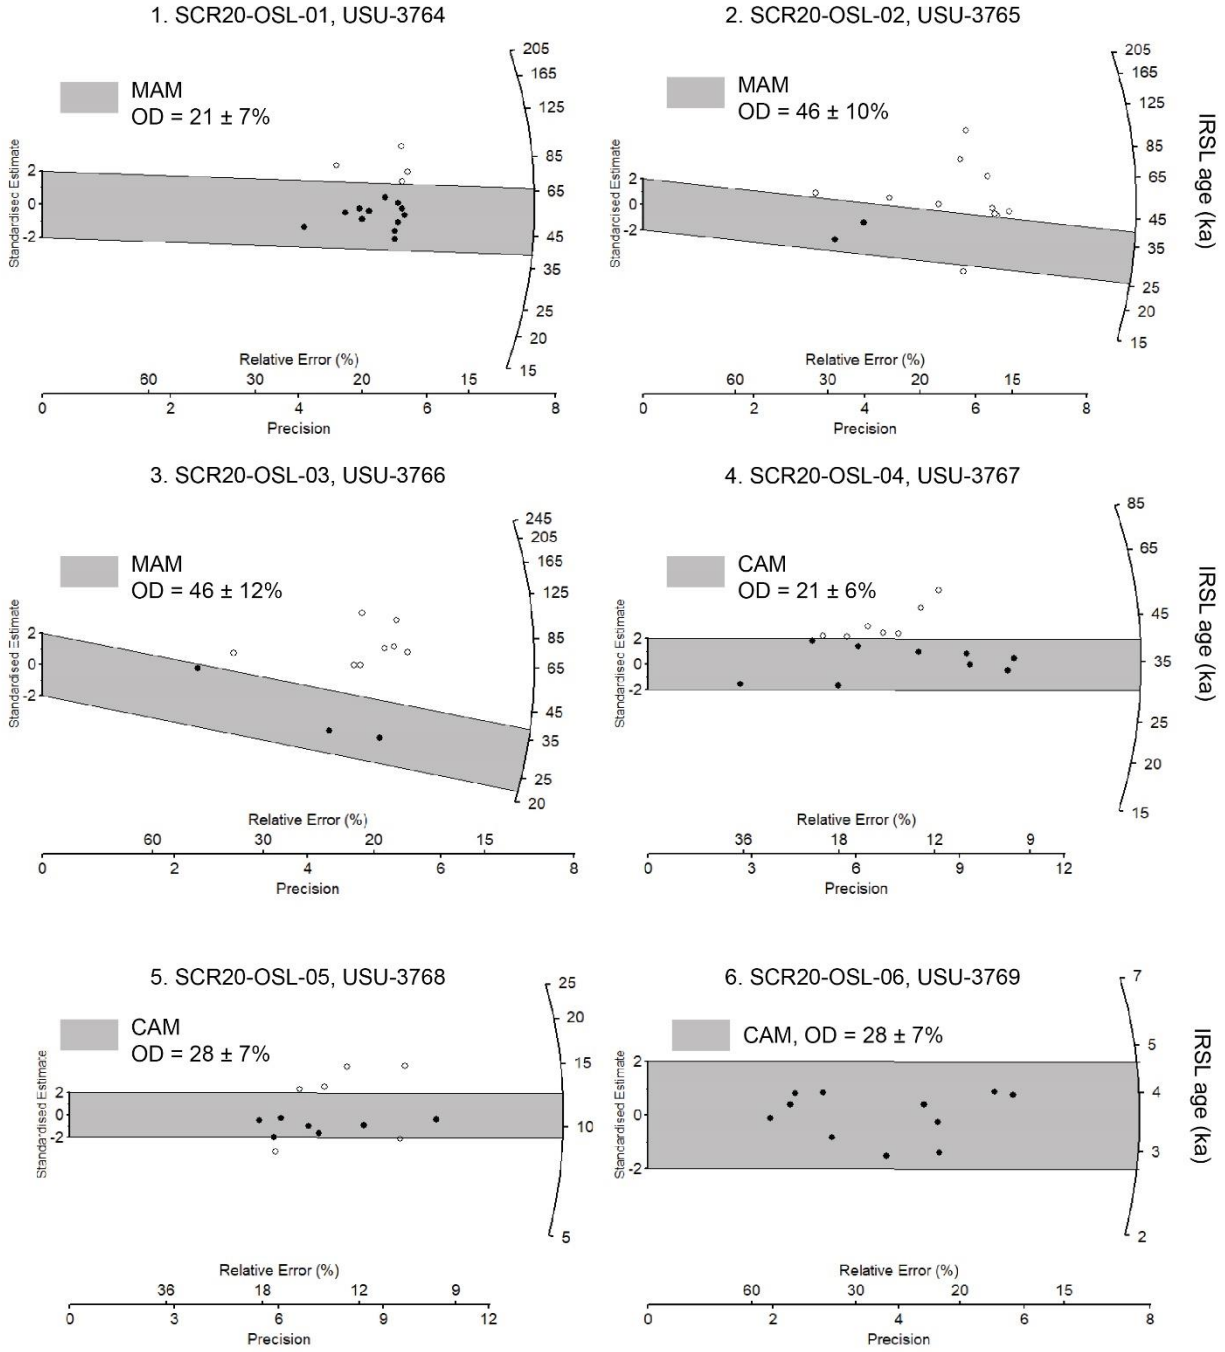

Fig. S 7

## References

- Douglass, D. C., Singer, B. S., Kaplan, M. R., Mickelson, D. M., and Caffee, M. W. (2006). Cosmogenic nuclide surface exposure dating of boulders on last-glacial and late-glacial moraines, Lago Buenos Aires, Argentina: Interpretive strategies and paleoclimate implications. *Quaternary Geochronology*, 1(1):43–58.
- Kaplan, M. R., Douglass, D. C., Singer, B. S., Ackert, R. P., and Caffee, M. W. (2005). Cosmogenic nuclide chronology of pre-last glacial maximum moraines at Lago Buenos Aires, 46S, Argentina. *Quaternary Research*, 63(3):301–315.
- Kaplan, M. R., Strelin, J. A., Schaefer, J. M., Denton, G. H., Finkel, R. C., Schwartz, R., Putnam, A. E., Vandergoes, M. J., Goehring, B. M., and Travis, S. G. (2011). In-situ cosmogenic  $^{10}\text{Be}$  production rate at Lago Argentino, Patagonia: Implications for late-glacial climate chronology. *Earth and Planetary Science Letters*, 309(1-2):21–32.
- Lal, D. (1991). Cosmic ray labeling of erosion surfaces: in situ nuclide production rates and erosion models. *Earth and Planetary Science Letters*, 104(2-4):424–439.
- Lifton, N., Sato, T., and Dunai, T. J. (2014). Scaling in situ cosmogenic nuclide production rates using analytical approximations to atmospheric cosmic-ray fluxes. *Earth and Planetary Science Letters*, 386:149–160.
- Stone, J. O. (2000). Air pressure and cosmogenic isotope production. *Journal of Geophysical Research: Solid Earth*, 105(B10):23753–23759.
